# Supplementary material
Source: publisher site journal article supplement (https://www.dovepress.com/article/429769)
Supplement: Supplementary file 1 [file get_supplementary_file.php]

# Supplementary Material

**Table S1 The characteristics of three mortality prediction models**

| Index                              | Cohort                                                                                                                                                                                                                                   | Items                                                                                                                                                                                                                                                                                                                                                                          | Points                                                                                 | Points (observed mortality)                                                 |
|------------------------------------|------------------------------------------------------------------------------------------------------------------------------------------------------------------------------------------------------------------------------------------|--------------------------------------------------------------------------------------------------------------------------------------------------------------------------------------------------------------------------------------------------------------------------------------------------------------------------------------------------------------------------------|----------------------------------------------------------------------------------------|-----------------------------------------------------------------------------|
| Walter Index <sup>1</sup>          | Hospitalized patients:<br>general medical service                                                                                                                                                                                        | Male                                                                                                                                                                                                                                                                                                                                                                           | 1                                                                                      | 1-year mortality                                                            |
| Walter et al.<br>2001<br>America   | Age ≥ 70 years<br>Development: n=1495<br>Mean age 81 years<br>1-year mortality 33%<br>C- statistic 0.75<br>External Validation: n=1427<br>Mean age 79 years<br>1-year mortality 28%<br>C- statistic 0.79                                 | ADL independencies at discharge<br>Dependent in 1-4 ADLs<br>Dependents in 5 ADLs<br>Comorbid conditions<br>Congestive heart failure<br>Solitary cancer<br>Metastatic cancer<br>Creatinine >3.0 mg/dL<br>Albumin, g/dL<br>3.0-3.4<br><3.0                                                                                                                                       | 2<br>5<br>2<br>3<br>8<br>2<br>1<br>2                                                   | 0-1 (13%)<br>2-3 (20%)<br>4-6 (37%)<br>>6 (68%)                             |
| CCI <sup>2</sup>                   | Hospitalized patients                                                                                                                                                                                                                    | Myocardial infarct<br>Congestive heart failure                                                                                                                                                                                                                                                                                                                                 | 1<br>1                                                                                 | 1-year mortality                                                            |
| Charlson et al.<br>1987<br>America | Development: n=559<br>External Validation: n=685<br>with histologically proven primary carcinoma of the breast                                                                                                                           | Peripheral vascular disease<br>Cerebrovascular disease<br>Dementia<br>Chronic pulmonary disease<br>Connective tissue disease<br>Ulcer disease<br>Mild liver disease<br>Diabetes<br>Hemiplegia<br>Moderate or severe renal disease<br>Diabetes with end organ damage<br>Any tumor<br>Leukemia<br>Lymphoma<br>Moderate or severe liver disease<br>Metastatic solid tumor<br>AIDS | 1<br>1<br>1<br>1<br>1<br>1<br>1<br>1<br>2<br>2<br>2<br>2<br>2<br>2<br>2<br>3<br>6<br>6 | 0 (12%)<br>1-2 (26%)<br>3-4 (52%)<br>>4 (85%)                               |
| GPI <sup>3</sup>                   | Age ≥ 65 years                                                                                                                                                                                                                           | Age, years<br>65-74<br>75-84<br>≥85                                                                                                                                                                                                                                                                                                                                            | 0<br>0.5<br>1                                                                          | 3-year mortality                                                            |
| Jung H et al.<br>2016<br>Korea     | Development: n=988<br>Community dwelling<br>Mean age 75.8<br>3-year mortality 9.3%<br>5-year mortality 18.1%<br>C-statistic:<br>3-year: 0.78<br>5-year: 0.80<br>External Validation:<br>Hospitalized patients<br>n=1109<br>Mean age 76.7 | Gender<br>Female<br>male<br>Korea ADL<br>Independent<br>Dependent in 1 ADL<br>Dependent in ≥2 ADLs<br>Korea IADL<br>Independent<br>Dependent in 1 IADL                                                                                                                                                                                                                         | 0<br>0<br>1<br>0<br>0.5<br>1<br>0<br>0.5                                               | 0 (0)<br>0 (0)<br>1 (0)<br>1.5 (1.3)<br>2.0 (4.3)<br>2.5 (1.7)<br>3.0 (5.9) |

|                        |                                    |     |            |
|------------------------|------------------------------------|-----|------------|
| 3-year mortality 20.3% | Dependent in $\geq 2$ IADLs        | 1   | 3.5 (12.1) |
| 5-year mortality 30.7% | Comorbidity                        |     |            |
| C- statistic:          | CCI 0 (or CIRS-G 0–3)              | 0   | 4.0 (14.4) |
| 3-year: 0.73           | CCI $\geq 1$ (or CIRS-G $\geq 4$ ) | 1   | 4.5 (18.2) |
| 5-year: 0.80           | Mood                               |     |            |
|                        | GDS-15 <5                          | 0   | 5.0 (23.9) |
|                        | GDS-15 5-8                         | 0.5 | 5.5 (23.1) |
|                        | GDS-15 9-15                        | 1   | 6.0 (34.5) |
|                        | Cognition                          |     |            |
|                        | MMSE 25-30                         | 0   | 6.5 (33.3) |
|                        | MMSE 18-24                         | 0.5 |            |
|                        | MMSE <18                           | 1   | 7.0 (50.0) |
|                        | Nutritional status                 |     |            |
|                        | MNA 24-30                          | 0   |            |
|                        | MNA 17-23.5                        | 0.5 |            |
|                        | MNA <17                            | 1   |            |

---

Abbreviations: CCI, Charlson Comorbidity index; GPI, Geriatric Prognostic Index; ADL, Activities of daily living; IADL, Instrumental activities of daily living; CIRS-G, Cumulative Illness Rating Scale for Geriatrics; GDS-15, Geriatric depression scale with 15 items; MMSE, Mini-Mental State Examination; MNA, Mini-Nutritional Assessment.

Notes: In our study, Nutritional status was evaluated by the Mini-Nutritional Assessment-Short Form (MNA-SF), including consists of a total of 6 items for food intake declined, weight loss, mobility, psychological stress or acute disease, neuropsychological problem, body mass index or calf circumference in cm. A score of MNA-SF >11 is defined as well-nourished, 8-11 as at risk of malnutrition, and <8 as malnourished, corresponding to a score of MNA >23.5, 17-23.5, and <17, respectively <sup>4</sup>.

---

**Table S2 The Characteristics of different ADL and IADL scales**

| Scales      | A modified version of Katz-ADL <sup>1,5</sup> | Korea ADL <sup>6</sup>                      | PSMS ADL <sup>7</sup>                                   | Korea IADL <sup>6</sup>            | Lawton IADL <sup>7</sup>           |
|-------------|-----------------------------------------------|---------------------------------------------|---------------------------------------------------------|------------------------------------|------------------------------------|
| Items       | Feeding                                       | Feeding                                     | Feeding                                                 | Using telephone                    | Using telephone                    |
|             | Dressing                                      | Dressing                                    | Dressing                                                | Shopping                           | Shopping                           |
|             | Bathing                                       | Bathing                                     | Bathing                                                 | Food preparation                   | Food preparation                   |
|             | Toileting                                     | Toileting                                   | Toileting and Continenence                              | Housekeeping                       | Housekeeping                       |
|             | Transfer (Transfer from bed to chair)         | Transfer (Transfer from bed to chair, room) | Transfer (Goes about grounds or city)                   | Laundry                            | Laundry                            |
|             |                                               | Washing face and hand                       | Grooming (neatness, hair, nails, hands, face, clothing) | Using transportation               | using transportation               |
|             |                                               | Continenence                                |                                                         | Responsibility for own medications | Responsibility for own medications |
|             |                                               |                                             |                                                         | Ability to handle finances         | Ability to handle finances         |
|             |                                               |                                             |                                                         | Outgoing for a short distance      |                                    |
|             |                                               |                                             |                                                         | Decorating                         |                                    |
| Total score | 5 scores                                      | 7 scores                                    | 6 scores                                                | 10 scores                          | 8 scores                           |

Abbreviations: ADL, Activities of daily living; IADL, Instrumental activities of daily living; PSMS, Physical Self-Maintenance Scale.

Notes: 1 score for each component; 1=dependent, 0=independent.

**Table S3 Sensitivity comparative analysis of pre- and post-imputation data**

| Variables         | 0                 | 1                 | 2                 | 3                 | 4                 | 5                 | 6                 | 7                 | 8                 | 9                 | 10                | 11                | 12                | 13                | 14                | 15                | 16                | 17                | 18                | 19                | 20                | P                 |                   |                 |           |
|-------------------|-------------------|-------------------|-------------------|-------------------|-------------------|-------------------|-------------------|-------------------|-------------------|-------------------|-------------------|-------------------|-------------------|-------------------|-------------------|-------------------|-------------------|-------------------|-------------------|-------------------|-------------------|-------------------|-------------------|-----------------|-----------|
| Albumin, g/dL     | 3.8<br>±<br>0.5   | 1.00<br>0         |                 |           |
| Creatine, mg/dL   | 0.9<br>±<br>0.6   | 1.00<br>0       |           |
| MNA-SF            | 10.<br>7 ±<br>3.2 | 1.00<br>0       |           |
| MMSE              | 25.<br>3 ±<br>5.0 | 25.<br>1 ±<br>5.1 | 25.<br>0 ±<br>5.2 | 25.<br>0 ±<br>5.3 | 25.<br>0 ±<br>5.2 | 25.<br>0 ±<br>5.2 | 25.<br>0 ±<br>5.2 | 25.<br>0 ±<br>5.3 | 24.<br>9 ±<br>5.3 | 25.<br>0 ±<br>5.1 | 25.<br>1 ±<br>5.1 | 25.<br>1 ±<br>5.2 | 25.<br>0 ±<br>5.3 | 25.<br>0 ±<br>5.2 | 24.<br>9 ±<br>5.3 | 25.<br>0 ±<br>5.2 | 25.<br>0 ±<br>5.3 | 24.<br>9 ±<br>5.3 | 25.<br>0 ±<br>5.2 | 1.00<br>0       |           |
| GDS-15            | 3.6<br>±<br>3.1   | 3.8<br>±<br>3.2   | 3.7<br>±<br>3.1   | 3.8<br>±<br>3.1   | 3.7<br>±<br>3.2   | 3.7<br>±<br>3.2   | 3.7<br>±<br>3.2   | 3.7<br>±<br>3.2   | 3.8<br>±<br>3.2   | 3.7<br>±<br>3.1   | 3.7<br>±<br>3.1   | 3.7<br>±<br>3.2   | 3.8<br>±<br>3.2   | 3.7<br>±<br>3.1   | 3.7<br>±<br>3.2   | 3.8<br>±<br>3.2   | 3.8<br>±<br>3.3   | 3.8<br>±<br>3.2   | 3.8<br>±<br>3.2   | 3.8<br>±<br>3.2   | 3.8<br>±<br>3.2   | 3.8<br>±<br>3.2   | 3.7<br>±<br>3.2   | 1.00<br>0       |           |
| SPPB              | 7.3<br>±<br>4.4   | 7.4<br>±<br>4.3   | 7.4<br>±<br>4.3   | 7.4<br>±<br>4.3   | 7.4<br>±<br>4.3   | 7.4<br>±<br>4.3   | 7.3<br>±<br>4.3   | 7.3<br>±<br>4.3   | 7.3<br>±<br>4.3   | 7.3<br>±<br>4.3   | 7.3<br>±<br>4.4   | 7.4<br>±<br>4.3   | 7.3<br>±<br>4.3   | 7.3<br>±<br>4.3   | 7.3<br>±<br>4.3   | 7.4<br>±<br>4.3   | 7.3<br>±<br>4.3   | 7.4<br>±<br>4.3   | 7.4<br>±<br>4.3   | 7.4<br>±<br>4.3   | 7.4<br>±<br>4.3   | 7.4<br>±<br>4.3   | 7.3<br>±<br>4.3   | 1.00<br>0       |           |
| Handgrip strength | 23.<br>5 ±<br>8.4 | 22.<br>6 ±<br>8.5 | 22.<br>8 ±<br>8.4 | 22.<br>8 ±<br>8.5 | 22.<br>7 ±<br>8.5 | 22.<br>8 ±<br>8.4 | 22.<br>7 ±<br>8.4 | 22.<br>8 ±<br>8.6 | 22.<br>8 ±<br>8.6 | 22.<br>8 ±<br>8.4 | 22.<br>7 ±<br>8.4 | 22.<br>9 ±<br>8.5 | 22.<br>6 ±<br>8.5 | 22.<br>6 ±<br>8.5 | 22.<br>8 ±<br>8.5 | 22.<br>6 ±<br>8.6 | 22.<br>6 ±<br>8.5 | 22.<br>8 ±<br>8.5 | 22.<br>8 ±<br>8.5 | 22.<br>8 ±<br>8.7 | 22.<br>9 ±<br>8.4 | 22.<br>7 ±<br>8.5 | 22.<br>7 ±<br>8.5 | 0.98<br>8       |           |
| Walter Index      | 2.8<br>±<br>2.9   | 2.8<br>±<br>2.9 | 1.00<br>0 |
| GPI               | 2.9<br>±<br>1.6   | 3.1<br>±<br>1.8   | 0.98<br>5       |           |
| FRAIL Scale       | 1.6<br>±<br>1.5   | 1.6<br>±<br>1.5   | 1.7<br>±<br>1.5   | 1.7<br>±<br>1.5   | 1.7<br>±<br>1.5   | 1.6<br>±<br>1.5   | 1.7<br>±<br>1.5   | 1.7<br>±<br>1.5   | 1.7<br>±<br>1.5   | 1.7<br>±<br>1.5   | 1.7<br>±<br>1.5   | 1.6<br>±<br>1.5   | 1.7<br>±<br>1.5   | 1.6<br>±<br>1.5   | 1.6<br>±<br>1.5   | 1.6<br>±<br>1.5   | 1.6<br>±<br>1.5   | 1.00<br>0       |           |

Abbreviations: MNA-SF, Mini-Nutritional Assessment Short Form; MMSE, Mini-Mental State Examination; GDS-15, Geriatric depression scale with 15 items; SPPB, Short Physical Performance Battery; GPI, Geriatric prognostic Index  
 Values are mean ±Standard Deviation; 0, Pre-imputation; 1-20, 20 datasets for post-imputation

**Table S4 Results of multivariate logistic regression of pre- and post-imputation data pooled by Rubin's rule**

|                     | Non-adjusted                  |                                          | Adjustment I                  |                                          | Adjustment II                 |                                          |
|---------------------|-------------------------------|------------------------------------------|-------------------------------|------------------------------------------|-------------------------------|------------------------------------------|
|                     | Pre-imputation<br>OR (95% CI) | Pooled by Rubin's<br>rule<br>OR (95% CI) | Pre-imputation<br>OR (95% CI) | Pooled by Rubin's<br>rule<br>OR (95% CI) | Pre-imputation<br>OR (95% CI) | Pooled by<br>Rubin's rule<br>OR (95% CI) |
| <b>Walter Index</b> |                               |                                          |                               |                                          |                               |                                          |
| 0-1                 | Reference                     | Reference                                | Reference                     | Reference                                | Reference                     | Reference                                |
| 2-3                 | 5.58 (1.54, 20.23)            | 5.56 (1.53, 20.17)                       | 5.21 (1.42, 19.06)            | 5.16 (1.41, 18.89)                       | 3.89 (1.03, 14.68)            | 3.90 (1.04, 14.68)                       |
| 4-6                 | 31.85 (9.63,<br>105.39)       | 31.85 (9.63,<br>105.36)                  | 23.86 (7.02, 81.07)           | 23.58 (6.94, 80.11)                      | 17.36 (4.96,<br>60.84)        | 17.12 (4.88,<br>60.03)                   |
| >6                  | 163.81 (48.56,<br>552.54)     | 166.93 (49.52,<br>562.74)                | 111.02 (31.73,<br>388.39)     | 112.09 (32.06,<br>391.85)                | 81.43 (22.54,<br>294.18)      | 84.80 (23.70,<br>303.39)                 |
| <b>CCI</b>          |                               |                                          |                               |                                          |                               |                                          |
| 0                   | Reference                     | Reference                                | Reference                     | Reference                                | Reference                     | Reference                                |
| 1-2                 | 2.58 (1.11, 5.99)             | 2.58 (1.11, 5.99)                        | 2.52 (1.07, 5.96)             | 2.52 (1.07, 5.95)                        | 2.22 (0.93, 5.32)             | 2.30 (0.96, 5.53)                        |
| 3-4                 | 6.28 (2.59, 15.21)            | 6.28 (2.59, 15.22)                       | 5.43 (2.14, 13.74)            | 5.43 (2.14, 13.76)                       | 3.89 (1.50, 10.08)            | 4.54 (1.75, 11.76)                       |
| >4                  | 48.30 (19.88,<br>117.30)      | 48.30 (19.8,<br>117.32)                  | 31.23 (12.24,<br>79.67)       | 31.23 (12.24,<br>79.68)                  | 27.06 (10.35,<br>70.76)       | 30.97 (11.76,<br>81.56)                  |
| <b>FRAIL Scale</b>  |                               |                                          |                               |                                          |                               |                                          |
| 0                   | Reference                     | Reference                                | Reference                     | Reference                                | Reference                     | Reference                                |
| 1-2                 | 3.47 (1.41, 8.51)             | 3.49 (1.42, 8.58)                        | 3.34 (1.33, 8.42)             | 3.35 (1.33, 8.43)                        | 2.76 (1.07, 7.15)             | 2.92 (1.14, 7.53)                        |
| 3-5                 | 14.06 (5.96,<br>33.18)        | 14.06 (5.96, 33.14)                      | 10.76 (4.33, 26.70)           | 10.53 (4.24, 26.14)                      | 7.97 (2.82, 22.56)            | 7.93 (2.83, 22.21)                       |
| <b>GPI</b>          |                               |                                          |                               |                                          |                               |                                          |
|                     | 1.73 (1.48, 2.03)             | 1.82 (1.59, 2.09)                        | 1.66 (1.38, 1.98)             | 1.70 (1.46, 1.99)                        | 1.63 (1.30, 2.04)             | 1.68 (1.37, 2.05)                        |

Abbreviations: OR, Odds Ratio; CI, Confidence Interval; CCI, Charlson Comorbidity index; GPI, Geriatric Prognostic Index.

Adjust I covariates: marital; social support network, cigarette, length of stay, number of medications, hemoglobin.

Adjust II covariates: Adjust I covariates+ Frail, handgrip strength, Short Physical Performance Battery.

**Table S5 Pairwise comparison of the receiver operating characteristic curves using the Delong method**

|              | Walter Index | GPI   | CCI   | FRAIL |
|--------------|--------------|-------|-------|-------|
| Walter Index | x            | <.001 | <.001 | <.001 |
| GPI          | <.001        | x     | .104  | .210  |
| CCI          | <.001        | .104  | x     | .211  |
| FRAIL Scale  | <.001        | .210  | .211  | x     |

Abbreviations: CCI, Charlson Comorbidity index; GPI, Geriatric Prognostic Index

**Table S6 Brier Scores of pre- and post-imputation data**

| Models       | 0   | 1   | 2   | 3   | 4   | 5   | 6   | 7   | 8   | 9   | 10  | 11  | 12  | 13  | 14  | 15  | 16  | 17  | 18  | 19  | 20  |
|--------------|-----|-----|-----|-----|-----|-----|-----|-----|-----|-----|-----|-----|-----|-----|-----|-----|-----|-----|-----|-----|-----|
| Walter Index | 0.0 | 0.0 | 0.0 | 0.0 | 0.0 | 0.0 | 0.0 | 0.0 | 0.0 | 0.0 | 0.0 | 0.0 | 0.0 | 0.0 | 0.0 | 0.0 | 0.0 | 0.0 | 0.0 | 0.0 | 0.0 |
| GPI          | 0.0 | 0.0 | 0.0 | 0.0 | 0.0 | 0.0 | 0.0 | 0.0 | 0.0 | 0.0 | 0.0 | 0.0 | 0.0 | 0.0 | 0.0 | 0.0 | 0.0 | 0.0 | 0.0 | 0.0 | 0.0 |
| FRAIL Scale  | 0.1 | 0.1 | 0.1 | 0.1 | 0.1 | 0.1 | 0.1 | 0.1 | 0.1 | 0.1 | 0.1 | 0.1 | 0.1 | 0.1 | 0.1 | 0.1 | 0.1 | 0.1 | 0.1 | 0.1 | 0.1 |

Abbreviations: GPI, Geriatric Prognostic Index  
Notes: 0, Pre-imputation; 1-20, 20 datasets for post-imputation

**Table S7 C-statistics of pre- and post-imputation data**

|                                   | 0   | 1   | 2   | 3   | 4   | 5   | 6   | 7   | 8   | 9   | 10  | 11  | 12  | 13  | 14  | 15  | 16  | 17  | 18  | 19  | 20  |
|-----------------------------------|-----|-----|-----|-----|-----|-----|-----|-----|-----|-----|-----|-----|-----|-----|-----|-----|-----|-----|-----|-----|-----|
| <b>Walter Index</b>               |     |     |     |     |     |     |     |     |     |     |     |     |     |     |     |     |     |     |     |     |     |
| C-statistic                       | 0.8 | 0.8 | 0.8 | 0.8 | 0.8 | 0.8 | 0.8 | 0.8 | 0.8 | 0.8 | 0.8 | 0.8 | 0.8 | 0.8 | 0.8 | 0.8 | 0.8 | 0.8 | 0.8 | 0.8 | 0.8 |
|                                   | 8   | 8   | 8   | 8   | 8   | 8   | 8   | 8   | 8   | 8   | 8   | 8   | 8   | 8   | 8   | 8   | 8   | 8   | 8   | 8   | 8   |
| 95% CI                            | 0.8 | 0.8 | 0.8 | 0.8 | 0.8 | 0.8 | 0.8 | 0.8 | 0.8 | 0.8 | 0.8 | 0.8 | 0.8 | 0.8 | 0.8 | 0.8 | 0.8 | 0.8 | 0.8 | 0.8 | 0.8 |
| down                              | 4   | 4   | 4   | 4   | 4   | 4   | 4   | 4   | 4   | 4   | 4   | 4   | 4   | 4   | 4   | 4   | 4   | 4   | 4   | 4   | 4   |
| 95% CI up                         | 0.9 | 0.9 | 0.9 | 0.9 | 0.9 | 0.9 | 0.9 | 0.9 | 0.9 | 0.9 | 0.9 | 0.9 | 0.9 | 0.9 | 0.9 | 0.9 | 0.9 | 0.9 | 0.9 | 0.9 | 0.9 |
|                                   | 1   | 1   | 1   | 1   | 1   | 1   | 1   | 1   | 1   | 1   | 1   | 1   | 1   | 1   | 1   | 1   | 1   | 1   | 1   | 1   | 1   |
| <b>Geriatric Prognostic Index</b> |     |     |     |     |     |     |     |     |     |     |     |     |     |     |     |     |     |     |     |     |     |
| C-statistic                       | 0.7 | 0.7 | 0.7 | 0.7 | 0.7 | 0.7 | 0.7 | 0.7 | 0.7 | 0.7 | 0.7 | 0.7 | 0.7 | 0.7 | 0.7 | 0.7 | 0.7 | 0.7 | 0.7 | 0.7 | 0.7 |
|                                   | 5   | 8   | 8   | 8   | 8   | 8   | 8   | 8   | 8   | 8   | 8   | 8   | 8   | 8   | 8   | 8   | 8   | 8   | 8   | 8   | 8   |
| 95% CI                            | 0.6 | 0.7 | 0.7 | 0.7 | 0.7 | 0.7 | 0.7 | 0.7 | 0.7 | 0.7 | 0.7 | 0.7 | 0.7 | 0.7 | 0.7 | 0.7 | 0.7 | 0.7 | 0.7 | 0.7 | 0.7 |
| down                              | 9   | 4   | 3   | 3   | 4   | 3   | 4   | 4   | 3   | 4   | 4   | 4   | 4   | 4   | 4   | 4   | 4   | 4   | 4   | 4   | 4   |
| 95% CI up                         | 0.8 | 0.8 | 0.8 | 0.8 | 0.8 | 0.8 | 0.8 | 0.8 | 0.8 | 0.8 | 0.8 | 0.8 | 0.8 | 0.8 | 0.8 | 0.8 | 0.8 | 0.8 | 0.8 | 0.8 | 0.8 |
|                                   | 0   | 3   | 3   | 3   | 3   | 3   | 3   | 3   | 3   | 3   | 3   | 3   | 3   | 3   | 3   | 3   | 3   | 3   | 3   | 3   | 3   |
| <b>FRAIL Scale</b>                |     |     |     |     |     |     |     |     |     |     |     |     |     |     |     |     |     |     |     |     |     |
| C-statistic                       | 0.7 | 0.7 | 0.7 | 0.7 | 0.7 | 0.7 | 0.7 | 0.7 | 0.7 | 0.7 | 0.7 | 0.7 | 0.7 | 0.7 | 0.7 | 0.7 | 0.7 | 0.7 | 0.7 | 0.7 | 0.7 |
|                                   | 4   | 3   | 4   | 4   | 4   | 4   | 4   | 4   | 4   | 4   | 4   | 4   | 4   | 3   | 4   | 4   | 4   | 4   | 4   | 3   | 4   |
| 95% CI                            | 0.6 | 0.6 | 0.6 | 0.6 | 0.6 | 0.6 | 0.6 | 0.6 | 0.6 | 0.6 | 0.6 | 0.6 | 0.6 | 0.6 | 0.6 | 0.6 | 0.6 | 0.6 | 0.6 | 0.6 | 0.6 |
| down                              | 9   | 9   | 9   | 9   | 9   | 9   | 9   | 9   | 9   | 9   | 9   | 9   | 9   | 9   | 9   | 9   | 9   | 9   | 9   | 9   | 9   |
| 95% CI up                         | 0.8 | 0.8 | 0.8 | 0.8 | 0.7 | 0.8 | 0.8 | 0.7 | 0.7 | 0.8 | 0.7 | 0.7 | 0.8 | 0.8 | 0.7 | 0.8 | 0.8 | 0.8 | 0.8 | 0.8 | 0.8 |
|                                   | 0   | 0   | 0   | 0   | 9   | 0   | 0   | 9   | 9   | 0   | 9   | 9   | 0   | 0   | 9   | 0   | 0   | 0   | 0   | 0   | 0   |

Notes: 0, Pre-imputation data; 1-20, 20 datasets of post-imputation

**Table S8 Observed and predicted 1-year mortality based on four models**

| Model s                           | No. Who Died/<br>No. at Risk | Observed mortality, % (95% CI) | Predicted mortality, % |
|-----------------------------------|------------------------------|--------------------------------|------------------------|
| <b>Walter Index</b>               |                              |                                |                        |
| 0-1                               | 3/347                        | 0.9 (0.2–2.5)                  | 0.9                    |
| 2-3                               | 11/237                       | 4.6 (2.3–8.2)                  | 4.7                    |
| 4-6                               | 35/161                       | 21.7 (15.6–28.9)               | 21.2                   |
| >6                                | 50/85                        | 58.8 (47.6–69.4)               | 59.4                   |
| <b>Geriatric Prognostic Index</b> |                              |                                |                        |
| 0                                 | 0/21                         | 0 (0.0-16.1)                   | 1.6                    |
| 0.5                               | 0/34                         | 0 (0.0-10.3)                   | 2.1                    |
| 1                                 | 0/63                         | 0 (0.0-5.7)                    | 2.7                    |
| 1.5                               | 5/89                         | 5.6 (1.8–12.6)                 | 3.5                    |
| 2                                 | 3/76                         | 3.9 (0.8–11.1)                 | 4.6                    |
| 2.5                               | 8/98                         | 8.2 (3.6–15.4)                 | 5.9                    |
| 3                                 | 4/73                         | 5.5 (1.5–13.4)                 | 7.6                    |
| 3.5                               | 7/55                         | 12.7 (5.3–24.5)                | 9.8                    |
| 4                                 | 6/50                         | 12.0 (4.5–24.3)                | 12.5                   |
| 4.5                               | 6/46                         | 13.0 (4.9–26.3)                | 15.8                   |
| 5                                 | 11/45                        | 24.4 (12.9–39.5)               | 19.8                   |
| 5.5                               | 8/40                         | 20.0 (9.1–35.6)                | 24.6                   |
| 6                                 | 10/24                        | 41.7 (22.1–63.4)               | 30.0                   |
| 6.5                               | 4/14                         | 28.6 (8.4–58.1)                | 36.0                   |
| 7                                 | 0/2                          | 0 (0.0-84.2)                   | 42.6                   |
| 7.5                               | 0/1                          | 0 (0.0-97.5)                   | 49.3                   |
| 8.0                               | 0/0                          | -                              | -                      |
| <b>Charlson Comorbidity Index</b> |                              |                                |                        |
| 0                                 | 7/235                        | 3.0 (1.2–6.0)                  | 2.0                    |
| 1-2                               | 29/395                       | 7.3 (5.0–10.4)                 | 7.2                    |
| 3-4                               | 21/130                       | 16.2 (10.3–23.6)               | 22.5                   |
| ≥5                                | 43/72                        | 59.7 (47.5–71.1)               | 52.4                   |
| <b>Frail Scale</b>                |                              |                                |                        |
| 0                                 | 6/237                        | 2.5 (0.5-4.5)                  | 2.3                    |
| 1-2                               | 28/339                       | 8.3 (5.3-11.2)                 | 8.5                    |
| 3-5                               | 65/243                       | 26.7 (21.2-32.3)               | 26.6                   |



**Table S9 Baseline characteristics of participants in the development and validation cohorts**

|                            | Development cohort<br>N=1495 | Validation cohort<br>N=832 |
|----------------------------|------------------------------|----------------------------|
| Age, mean (SD)/mean (IQR)  | 81 (7)                       | 77.0 (74.0–82.0)           |
| Male, n (%)                | 491(33)                      | 380 (45.7)                 |
| ADL, n (%)                 |                              |                            |
| Independent in all ADLs    | 604 (41)                     | 463 (55.6)                 |
| Dependent in 1-4 ADLs      | 601(40)                      | 325 (39.1)                 |
| Dependent in all ADLs      | 520 (35)                     | 44 (5.3)                   |
| ALB, n (%)                 |                              |                            |
| >3.4                       | 1089 (73)                    | 668 (80.4)                 |
| 3.0-3.4                    | 255 (17)                     | 117 (14.1)                 |
| <3.0                       | 151 (10)                     | 46 (5.5)                   |
| Creatine, n (%)            |                              |                            |
| ≤3.0                       | 1344 (90)                    | 821(98.8)                  |
| >3.0                       | 151 (10)                     | 2 (1.2)                    |
| Comorbid conditions, n (%) |                              |                            |
| Myocardial infarction      | 208 (14)                     | 37 (4.4)                   |
| Congestive heart failure   | 400 (27)                     | 57 (6.9)                   |
| Dementia                   | 271 (18)                     | 43 (5.2)                   |
| Chronic pulmonary disease  | 256 (17)                     | 98 (11.8)                  |
| Diabetes                   | 265 (18)                     | 231 (27.8)                 |
| Solitary cancer            | 111 (7)                      | 95 (11.4)                  |
| Metastatic cancer          | 47 (3)                       | 53 (6.4)                   |
| Cerebrovascular disease    | 250 (17)                     | 135 (16.2)                 |
| Married, n (%)             | 520 (35)                     | 642 (77.2)                 |
| Length of stay >7d, n (%)  | 458 (31)                     | 761 (91.5)                 |
| Walter index, n (%)        |                              |                            |
| 0-1                        | 356 (23.8)                   | 347 (41.8)                 |
| 2-3                        | 382 (25.6)                   | 237 (28.6)                 |
| 4-6                        | 475 (31.8)                   | 161 (19.4)                 |
| >6                         | 282 (18.9)                   | 85 (10.2)                  |
| 1-year mortality, n (%)    | 492 (32.9)                   | 100 (12.0)                 |

Abbreviations: SD, Standard Deviation; IQR, Interquartile Range  
Notes: The development cohort refers to the development cohort of the original study of Walter Index; The validation cohort refers to our study population

## Supplementary Figures

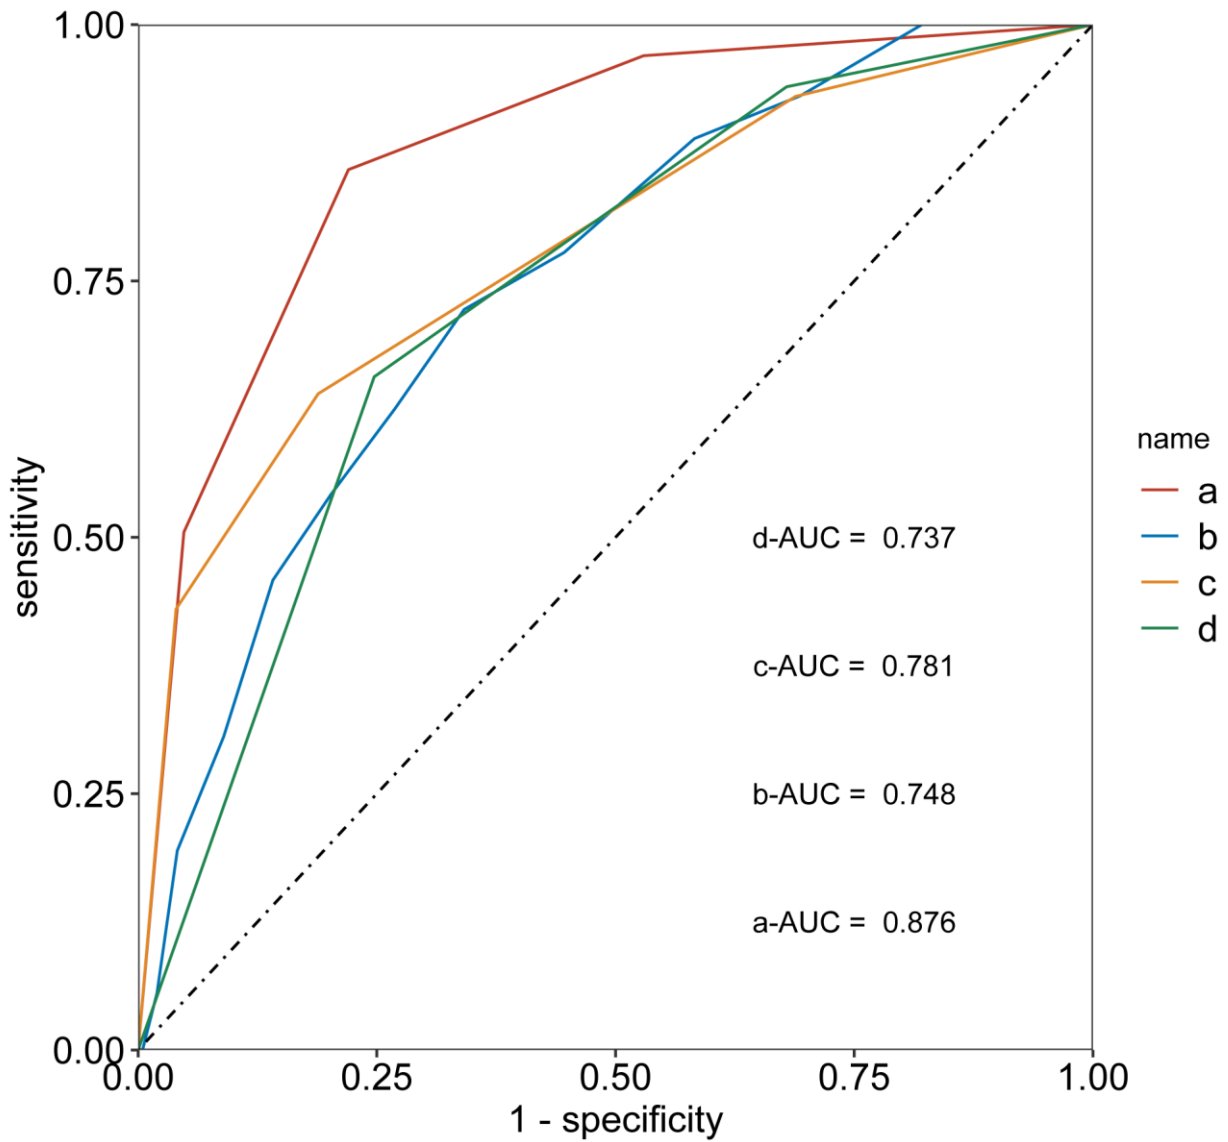

**Figure S1 Area under the receiver operating characteristic curves for 1-year mortality**

Notes: Area under the receiver operating characteristic curves of four models were Walter Index (Model a): 0.88 (95% CI 0.84-0.91), Geriatric Prognostic Index (Model b): 0.75 (95% CI 0.69-0.80), Charlson Comorbidity Index (Model c): 0.78 (95% CI 0.73-0.83), and FRAIL Scale (Model d): 0.74 (95% CI 0.69-0.78), respectively.

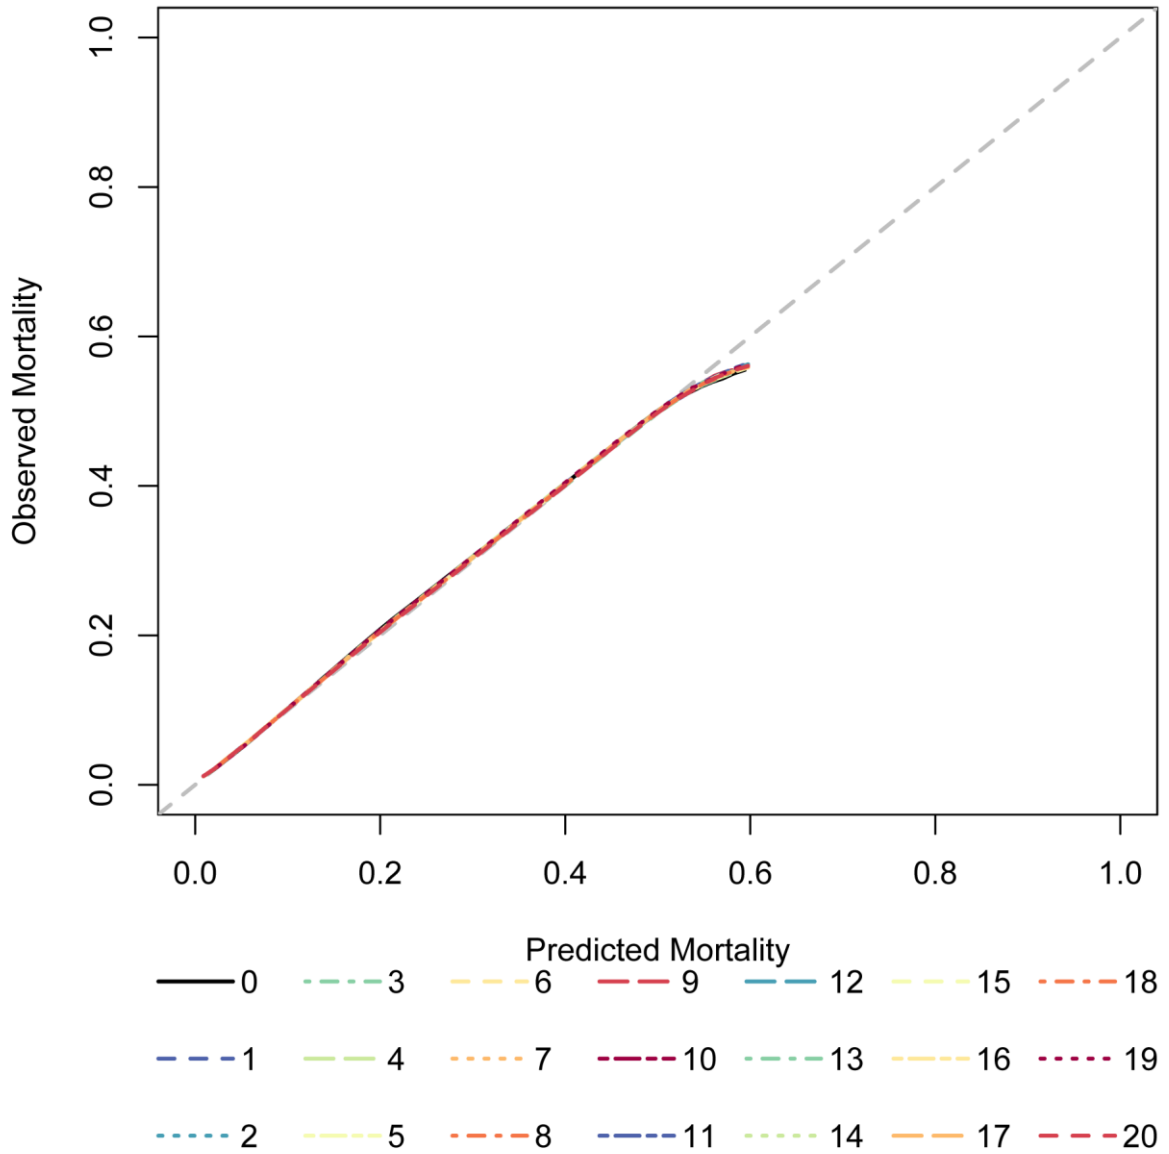

**Figure S2 Walter Index calibration curves of pre- and post-imputation data**

Notes: Calibration plot with predicted mortality on the x-axis and observed mortality on the y-axis. A perfect prediction corresponds to the 45° dotted line (ideal calibration line). Calibration curves were bias-corrected using bootstrapping (B=1000 repetitions), indicating the performance of the observed models.

0, Pre-imputation data; 1-20, 20 datasets for post-imputation

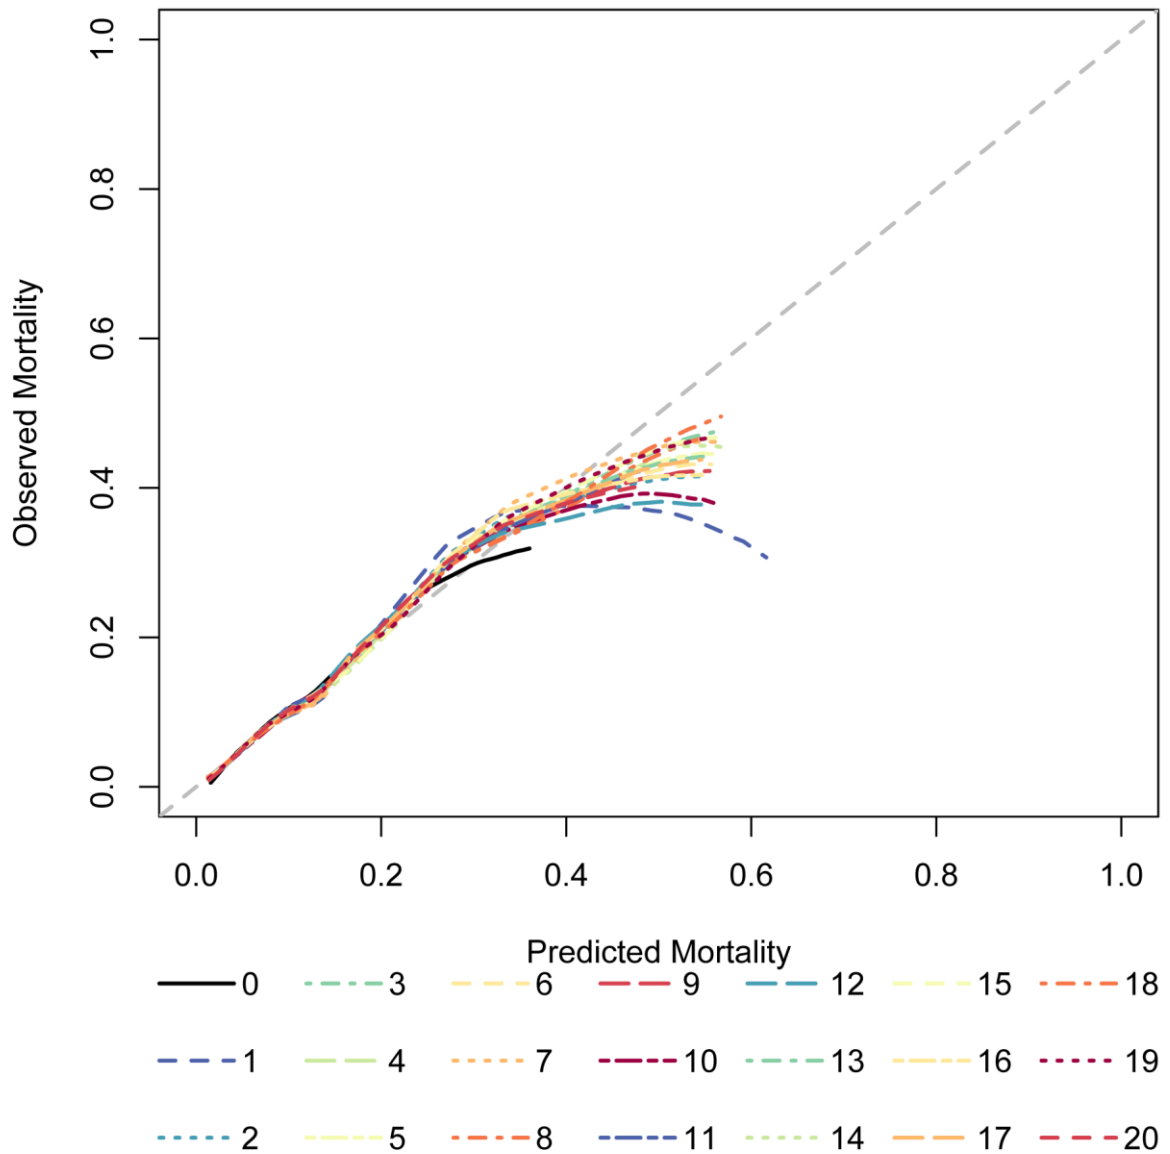

**Figure S3 Geriatric Prognostic Index calibration curves of pre- and post-imputation data**

Notes: Calibration plot with predicted mortality on the x-axis and observed mortality on the y-axis. A perfect prediction corresponds to the 45° dotted line (ideal calibration line). Calibration curves were bias-corrected using bootstrapping (B=1000 repetitions), indicating the performance of the observed models.

0, Pre-imputation data; 1-20, 20 datasets for post-imputation

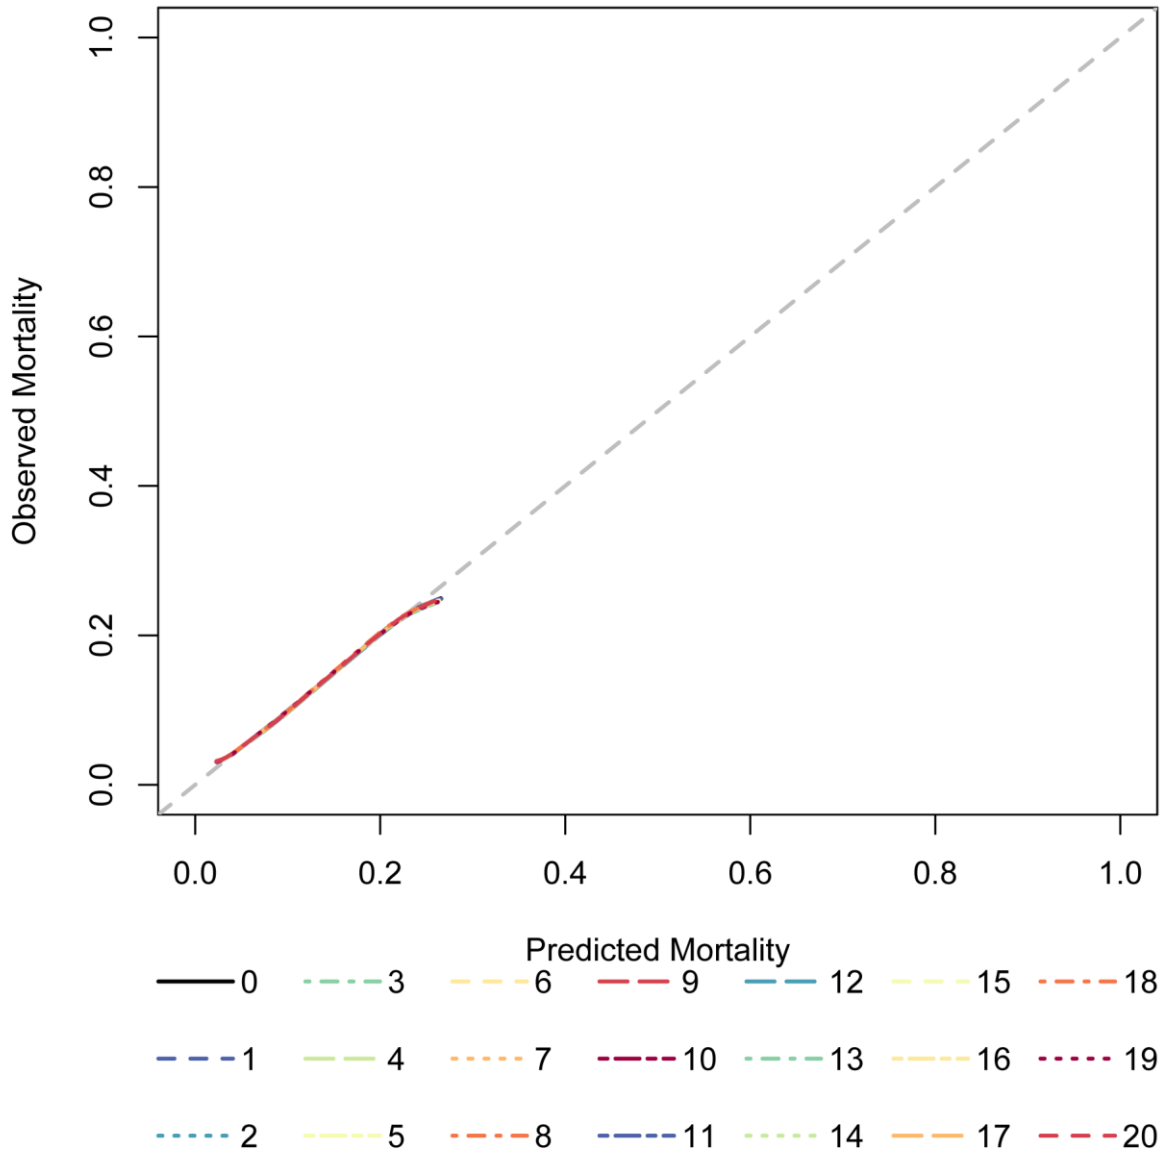

**Figure S4 FRAIL calibration curves of pre- and post-imputation data**

Notes: Calibration plot with predicted mortality on the x-axis and observed mortality on the y-axis. A perfect prediction corresponds to the 45° dotted line (ideal calibration line). Calibration curves were bias-corrected using bootstrapping (B=1000 repetitions), indicating the performance of the observed models.

0, Pre-imputation data; 1-20, 20 datasets for post-imputation

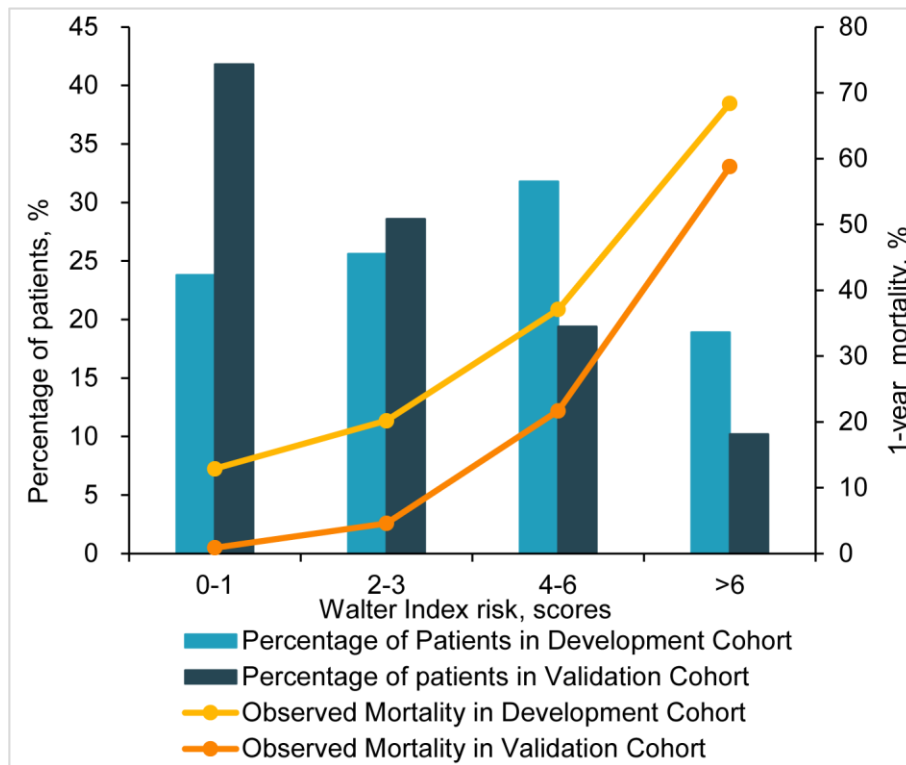

**Figure S5 The distribution of calculated risk scores and observed 1-year mortality in the development cohort of the Walter Index and validation cohort of this study**

Notes: The columns show the percentage of people in different subgroups, and the lines show the observed 1-year mortality. The development cohort refers to the development cohort of the original study of Walter Index; The validation cohort refers to our study population.

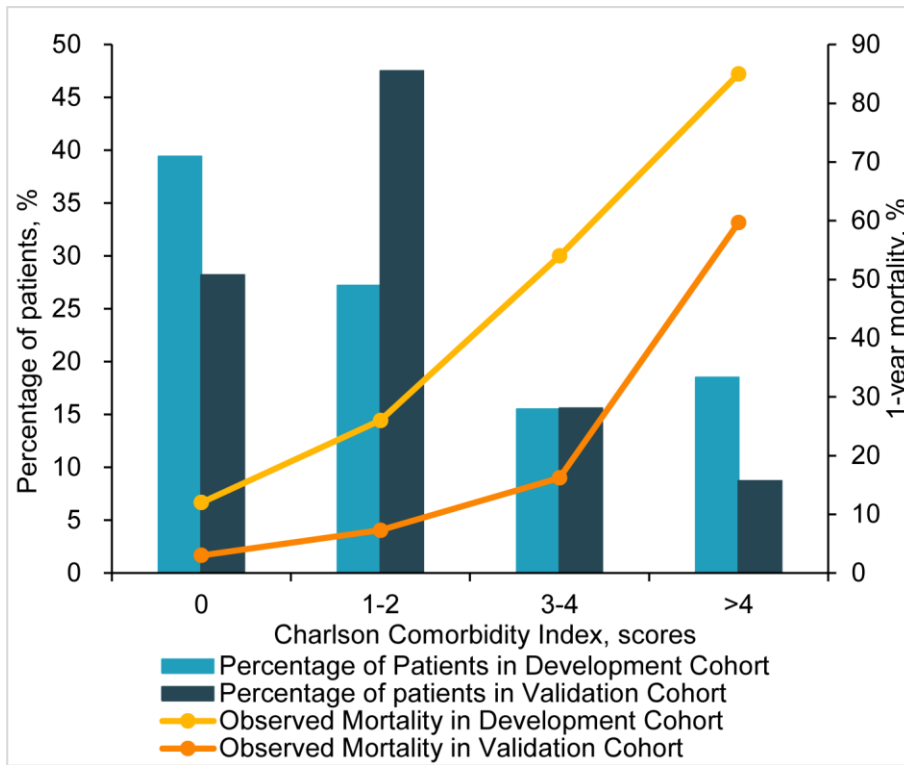

**Figure S6 The distribution of calculated risk scores and observed 1-year mortality in the development cohort of the CCI and validation cohort of this study**

Notes: The columns show the percentage of people in different subgroups, and the lines show the observed 1-year mortality. The development cohort refers to the development cohort of the original study of CCI; The validation cohort refers to our study population.

## References

1. Walter L, Brand R, Counsell S, et al. Development and validation of a prognostic index for 1-year mortality in older adults after hospitalization. *JAMA*. 2001;285(23):2987-2994.
2. Charlson M, Pompei P, Ales K, MacKenzie C. A new method of classifying prognostic comorbidity in longitudinal studies: development and validation. *Journal of chronic diseases*. 1987;40(5):373-383.
3. Jung H, Kim J, Han J, et al. Multidimensional Geriatric Prognostic Index, Based on a Geriatric Assessment, for Long-Term Survival in Older Adults in Korea. *PloS one*. 2016;11(1):e0147032.
4. Rubenstein L, Harker J, Salvà A, Guigoz Y, Vellas B. Screening for undernutrition in geriatric practice: developing the short-form mini-nutritional assessment (MNA-SF). *J Gerontol A Biol Sci Med Sci*. 2001;56(6):M366-372.
5. KATZ S, FORD A, MOSKOWITZ R, JACKSON B, JAFFE M. STUDIES OF ILLNESS IN THE AGED. THE INDEX OF ADL: A STANDARDIZED MEASURE OF BIOLOGICAL AND PSYCHOSOCIAL FUNCTION. *JAMA*. 1963;185:914-919.
6. Won CW YK, Rho YG, Kim SY, Lee EJ, Yoon JL, et al. The Development of Korean Activities of Daily Living(K-ADL) and Korean Instrumental Activities of Daily Living(K-IADL) Scale. *Korean Geriatr Soc*. 2002:6.
7. Lawton M, Brody E. Assessment of older people: self-maintaining and instrumental activities of daily living. *The Gerontologist*. 1969;9(3):179-186.
